# Supplementary material for: Comparative Transcriptome of Isonuclear Alloplasmic Strain Revealed the Important Role of Mitochondrial Genome in Regulating Flammulina filiformis
Source: MDPI journal article supplement (doi:10.3390/agronomy13040998), 2023-03-28
Supplement: s1 [file s1]

## Supplementary files

**Table S1.** Summary of the transcriptome sequencing of the isonuclear alloplasmic strain of *F. filiformis*.

| Sample | Total Raw Reads | Total Clean Reads (%) | Clean Bases   | GC (%) |
|--------|-----------------|-----------------------|---------------|--------|
| M1_1   | 20,017,959      | 20,016,738(99.99%)    | 6,004,832,502 | 53.49  |
| M1_2   | 22,499,971      | 22,498,684(99.99%)    | 6,749,364,512 | 53.5   |
| M1_3   | 21,379,105      | 21,377,917(99.99%)    | 6,413,137,206 | 53.61  |
| M2_1   | 21,661,185      | 21,660,514(99.99%)    | 6,497,803,936 | 53.85  |
| M2_2   | 22,637,497      | 22,636,726(99.99%)    | 6,790,823,350 | 53.54  |
| M3_3   | 21,099,320      | 21,098,578(99.99%)    | 6,329,364,908 | 53.78  |
| P1_1   | 20,669,020      | 20,666,662(99.99%)    | 6,199,635,280 | 53.77  |
| P1_2   | 22,308,253      | 22,305,678(99.99%)    | 6,691,454,632 | 53.72  |
| P1_3   | 19,855,093      | 19,852,433(99.99%)    | 5,955,486,738 | 53.63  |
| P2_1   | 18,468,051      | 18,466,017(99.99%)    | 5,539,499,546 | 53.79  |
| P2_2   | 20,343,988      | 20,341,430(99.99%)    | 6,102,103,252 | 53.75  |
| P3_3   | 23,600,733      | 23,597,952(99.99%)    | 7,078,892,378 | 53.32  |
| YF1_1  | 18,480,730      | 18,478,637(99.99%)    | 5,543,341,450 | 53.6   |
| YF1_2  | 17,691,296      | 17,689,015(99.99%)    | 5,306,455,422 | 53.72  |
| YF1_3  | 22,983,749      | 22,980,902(99.99%)    | 6,893,918,224 | 53.76  |
| YF2_1  | 20,515,219      | 20,512,806(99.99%)    | 6,153,457,682 | 53.64  |
| YF2_2  | 18,751,383      | 18,749,226(99.99%)    | 5,624,437,498 | 53.56  |
| YF3_3  | 20,532,445      | 20,529,936(99.99%)    | 6,158,637,704 | 53.71  |
| FB1_1  | 25,374,941      | 25,373,457(99.99%)    | 7,611,735,016 | 53.87  |
| FB1_2  | 23,593,251      | 23,591,888(99.99%)    | 7,077,256,998 | 53.89  |
| FB1_3  | 20,873,905      | 20,872,049(99.99%)    | 6,260,361,860 | 53.95  |
| FB2_1  | 22,139,555      | 22,138,256(99.99%)    | 6,641,206,138 | 53.76  |
| FB2_2  | 21,433,113      | 21,431,780(99.99%)    | 6,429,276,578 | 53.83  |
| FB3_3  | 19,161,190      | 19,159,932(99.99%)    | 5,747,798,844 | 53.81  |

Note: M1\_1, M1\_2, M1\_3 is the three independent biological replicates of *F. filiformis* strain J1-Y33 during mycelium growth stage; M2\_1, M2\_2, M3\_3 is the three independent biological replicates of *F. filiformis* strain Y33-J1 during mycelium growth stage; P1\_1, P1\_2, P1\_3 is the three independent biological replicates of J1-Y33 during primordia formation stage; P2\_1, P2\_2, P3\_3 is the three independent biological replicates of Y33-J1 during primordia formation stage; YF1\_1, YF1\_2, YF1\_3 is the three independent biological replicates of J1-Y33 during young mushroom stage; YF2\_1, YF2\_2, YF3\_3 is the three independent biological replicates of Y33-J1 during young mushroom stage; FB1\_1, FB1\_2, FB1\_3 is the three independent biological replicates of J1-Y33 during fruiting body stage; FB2\_1, FB2\_2, FB3\_3 is the three independent biological replicates of Y33-J1 during fruiting body stage.

**Table S2.** The primers used in this study.

| Gene     | Primer Name | Primer Sequence      |
|----------|-------------|----------------------|
| GB008257 | GB008257-F  | TCTACGACAGGCAACGAACC |
|          | GB008257-R  | AGCGCCAGATATCAAGCCAA |
| GB007198 | GB007198-F  | ATTCGCGGTCGTGATCAACT |
|          | GB007198-R  | CGCGTCGAATAAACTCGCAG |
| GB009214 | GB009214-F  | CTTCGATATCCACCCGACG  |
|          | GB009214-R  | ACGACAGTGGTAACGCCATT |
| GB009768 | GB009768-F  | TATCCCCGCTTTCCTACCGC |
|          | GB009768-R  | CCTTTCATCCGCCTTGAGT  |
| GB006100 | GB006100-F  | CGCTTCGCAAGACGTACAAG |
|          | GB006100-R  | TGGTTCGTAGAAACCCAGCC |
| GB004373 | GB004373-F  | TCGGTATCGCCGCTTTAGTC |

|          |            |                       |
|----------|------------|-----------------------|
|          | GB004373-R | CTCTTGCGTGGGAGTCAAGT  |
| GB006766 | GB006766-F | AACCAAACATTTGCGGCACA  |
|          | GB006766-R | GAGGTACTCGTATTGCGGGG  |
| GB005431 | GB005431-F | TACAGACGTTGAAGGGTGCC  |
|          | GB005431-R | AGAGGGTTGGATGAGCAAGC  |
| GB001767 | GB001767-F | GAGGCAACATCAACGAAGGC  |
|          | GB001767-R | ACAAAATCGCACCCCTTTGCC |
| GB005682 | GB005682-F | GCTTCCCGAGAGTACGGATG  |
|          | GB005682-R | GACCGAAAAGGGACGGAAC   |
| GB006651 | GB006651-F | TGACACGGAAGGAAAGCCTC  |
|          | GB006651-R | CTTGTTGGTGCTCGAGTCCT  |

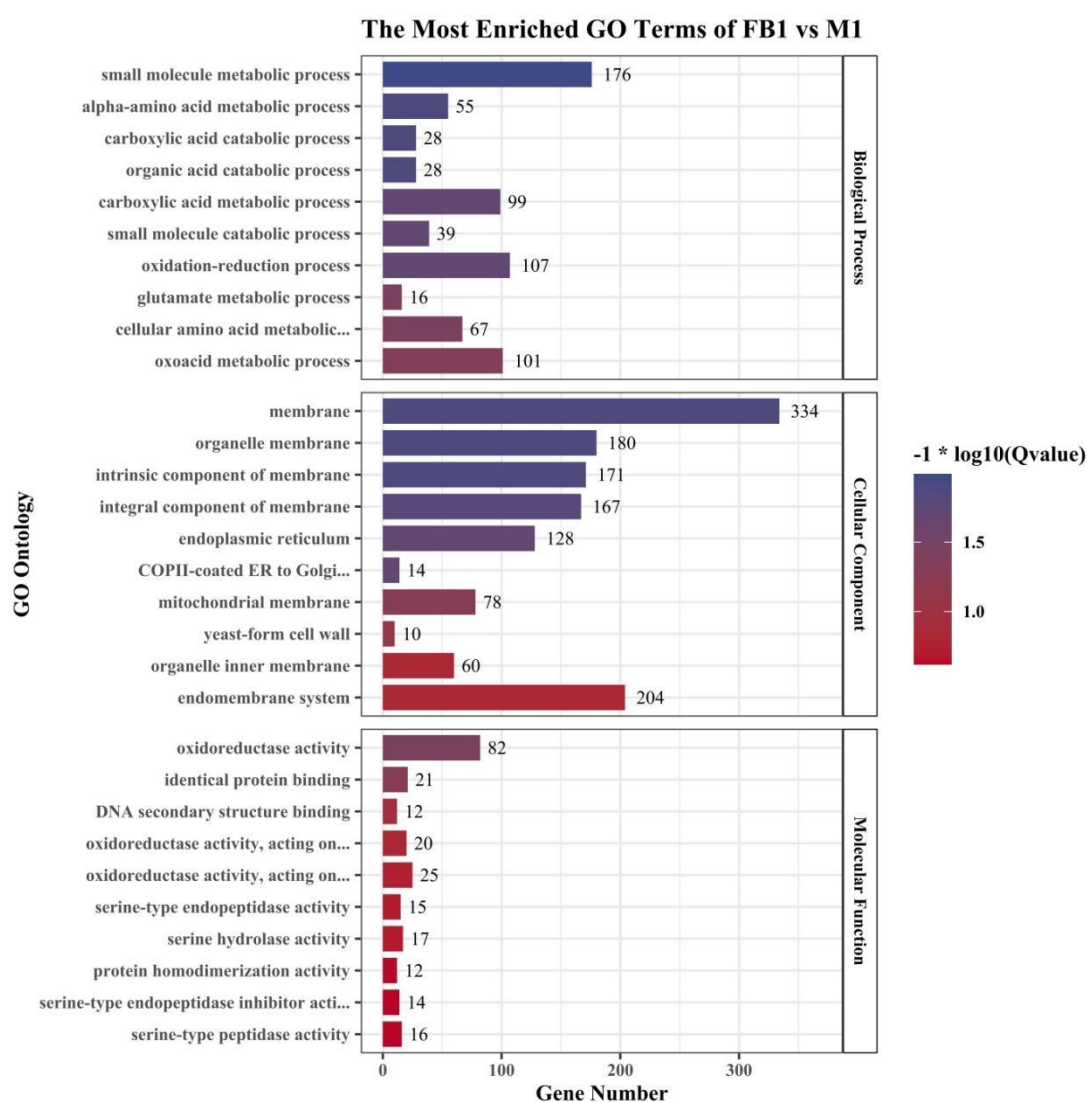

**Figure S1.** The Gene Ontology (GO) enrichment analysis of the differentially expressed genes (DEGs) between the fruiting body stage of *F. filiformis* J1-Y33 (FB1) and the mycelium growth stage of *F. filiformis* J1-Y33 (M1) was conducted. The results were summarized in three main GO categories, namely Biological Process, Cellular Component and Molecular Function. The x-axis denoted the number of differentially expressed genes annotated in the GO category, while the y-axis indicated the GO term. The color of each GO category represented the  $-\log_{10}(Q\text{-value})$ . This value is a measure of the statistical significance of the GO term which is used to investigate the biological relevance of the DEGs.

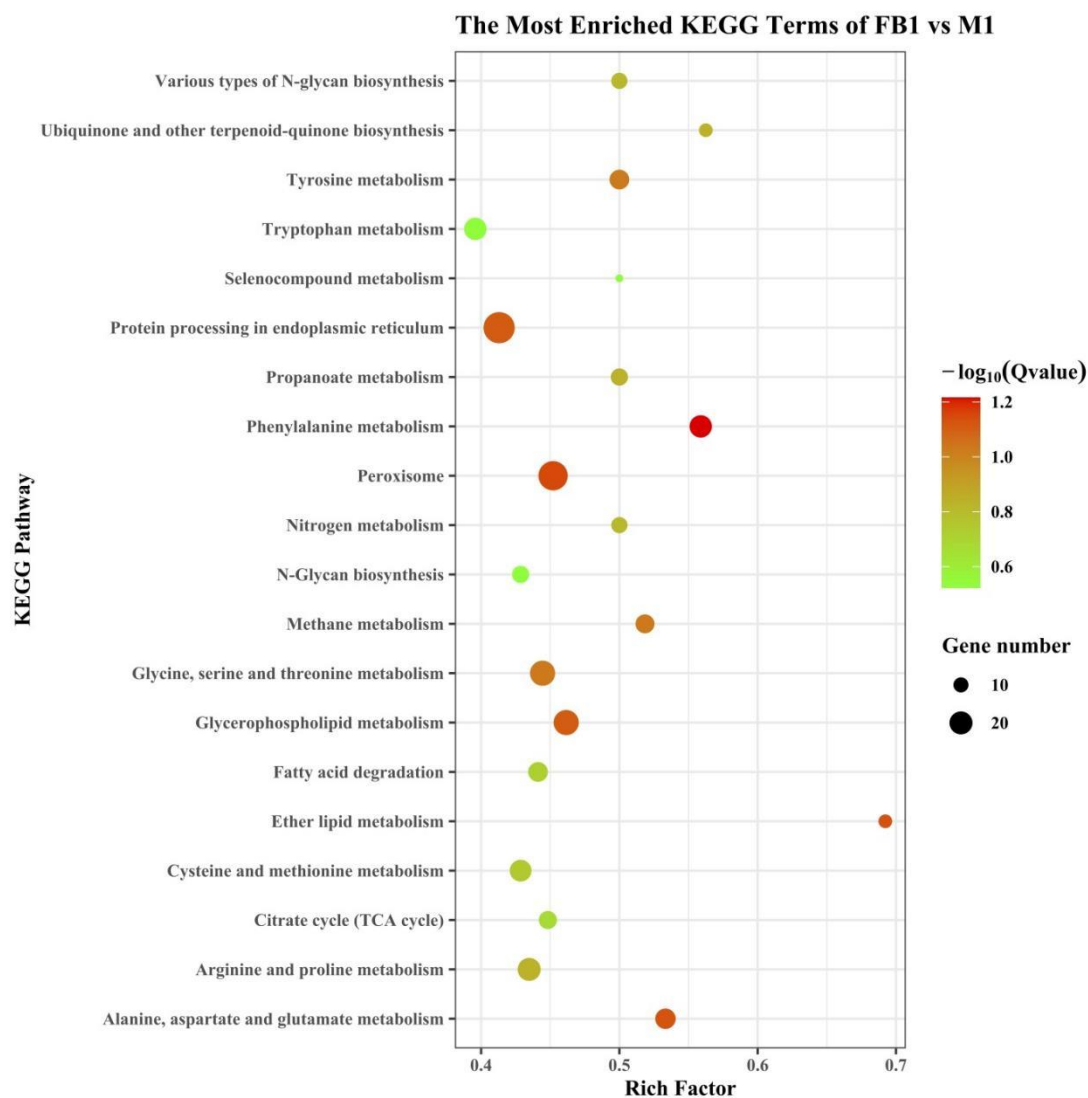

**Figure S2.** KEGG enrichment analysis of the differentially expressed genes (DEGs) between the fruiting body stage of *F. filiformis* J1-Y33 (FB1) and the mycelium growth stage of *F. filiformis* J1-Y33 (M1) is presented. The x-axis of the figure displays the rich factor, while the y-axis reflects the KEGG pathway. The count indicates the number of DEGs enriched in the pathway, and the color implies the  $-\text{Log}_{10}(\text{Q-value})$  of each pathway.

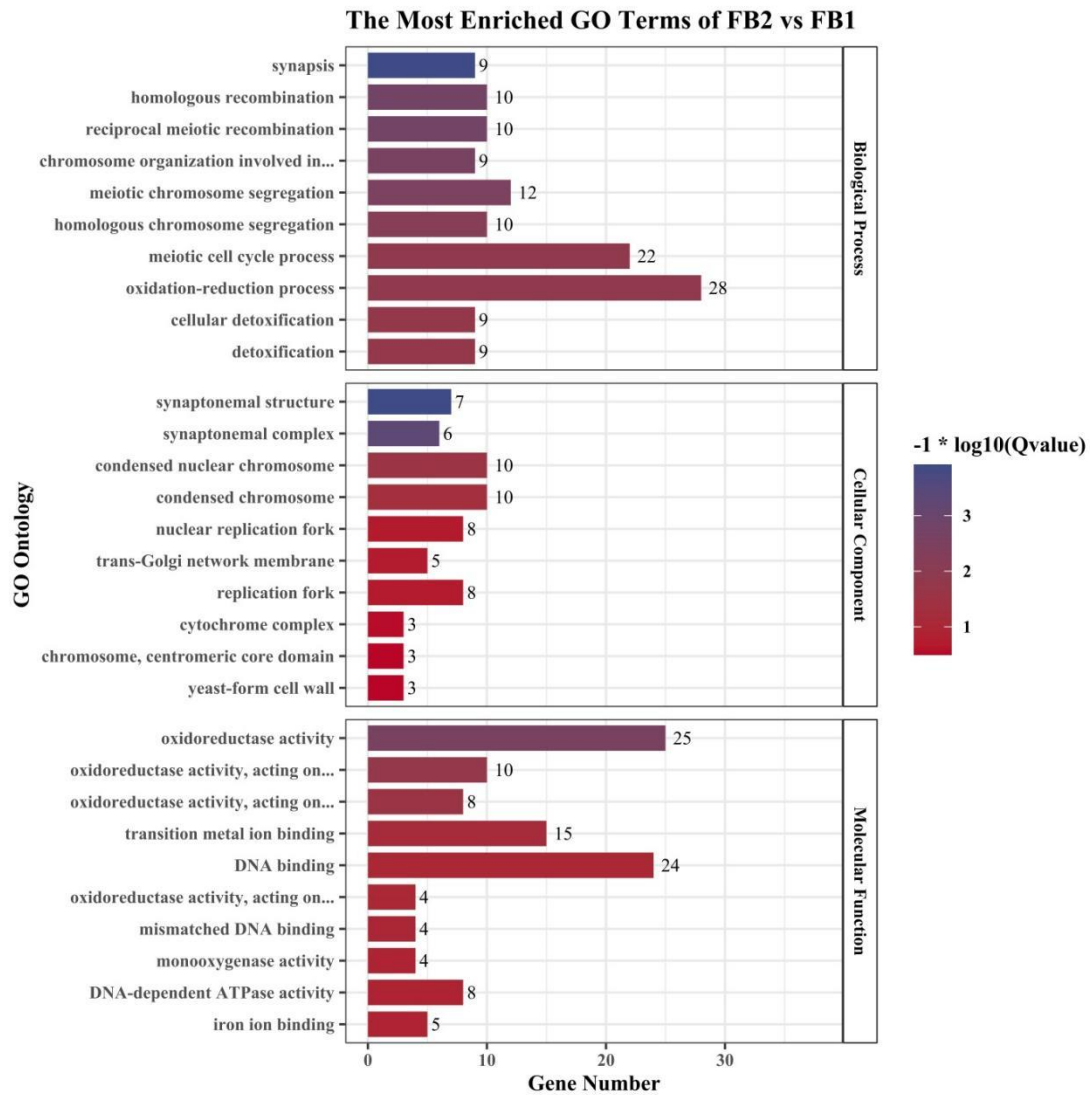

**Figure S3.** The Gene Ontology (GO) enrichment analysis of the differentially expressed genes (DEGs) between the fruiting body stage of *F. filiformis* Y33-J1 (FB2) and the fruiting body stage of *F. filiformis* J1-Y33 (FB1) was conducted. The results were summarized in three main GO categories, namely Biological Process, Cellular Component and Molecular Function. The x-axis denoted the number of differentially expressed genes annotated in the GO category, while the y-axis indicated the GO term. The color of each GO category represented the  $-\log_{10}(Q\text{-value})$ . This value is a measure of the statistical significance of the GO term which is used to investigate the biological relevance of the DEGs.

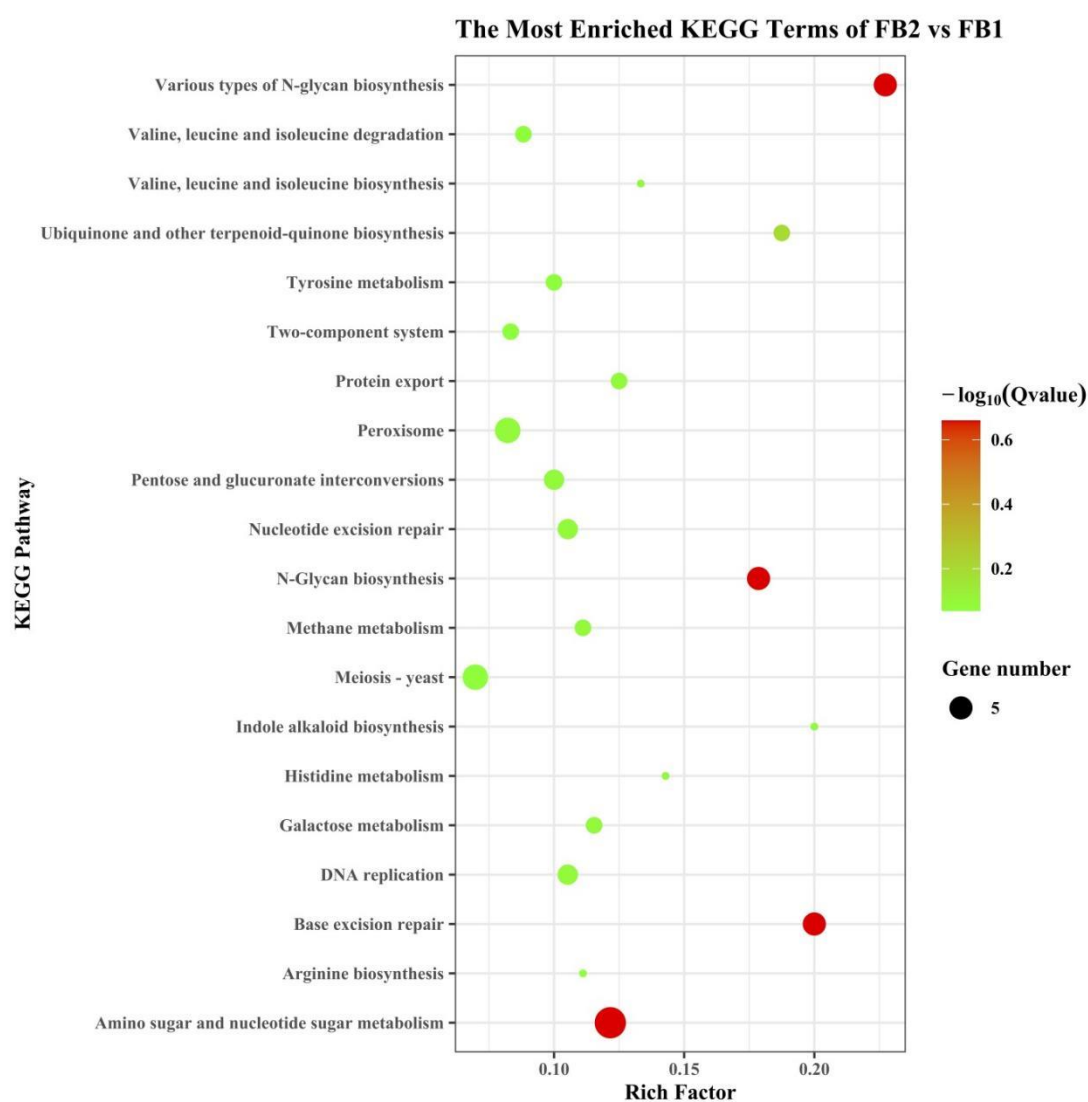

**Figure S4.** KEGG enrichment analysis of the differentially expressed genes (DEGs) between the fruiting body stage of *F. filiformis* Y33-J1 (FB2) and the fruiting body stage of *F. filiformis* J1-Y33 (FB1) is presented. The x-axis of the figure displays the rich factor, while the y-axis reflects the KEGG pathway. The count indicates the number of DEGs enriched in the pathway, and the color implies the  $-\text{Log}_{10}(\text{Q-value})$  of each pathway.

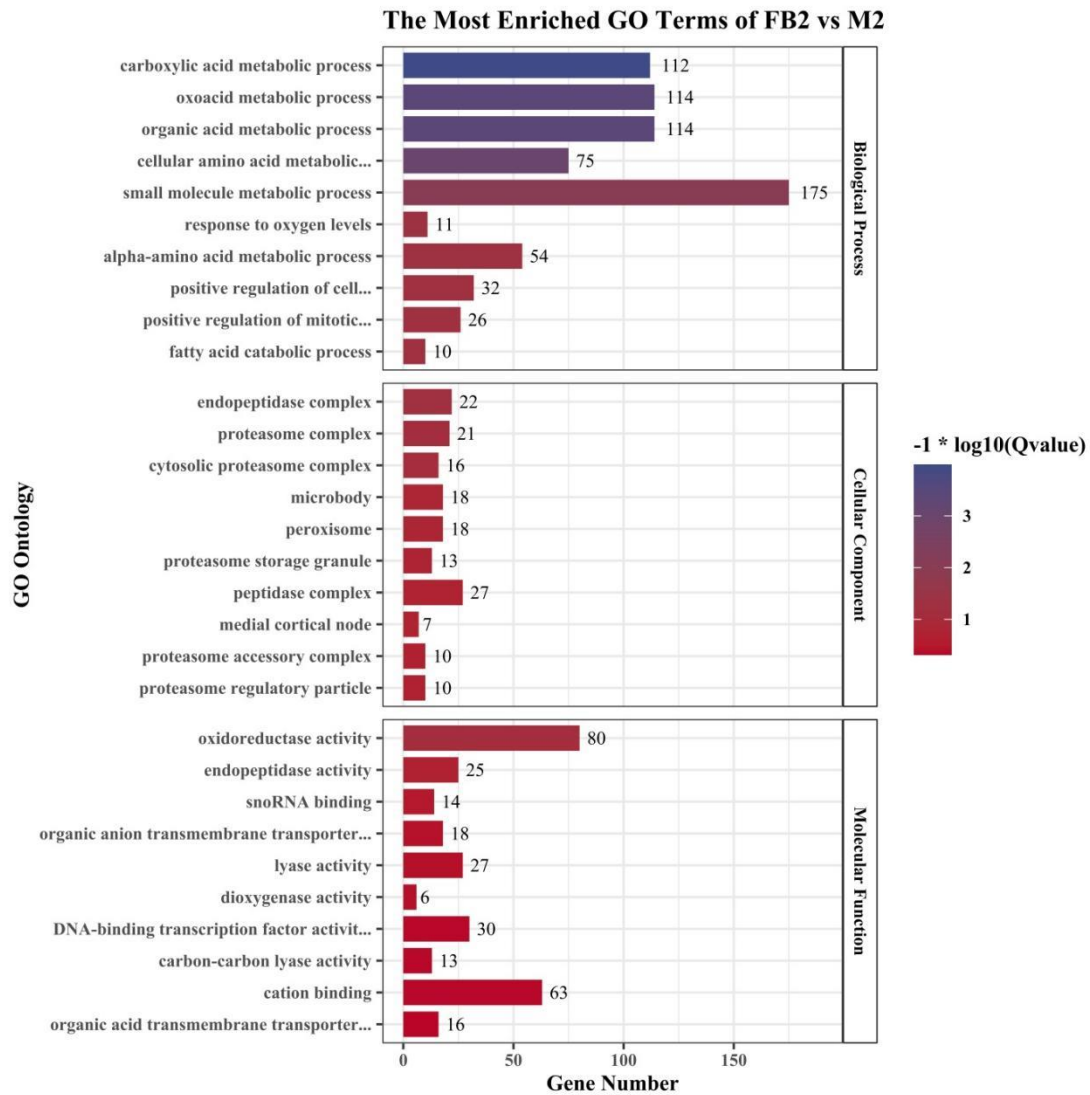

**Figure S5.** The Gene Ontology (GO) enrichment analysis of the differentially expressed genes (DEGs) between the fruiting body stage of *F. filiformis* Y33-J1 (FB2) and the mycelium growth stage of *F. filiformis* J1-Y33 (FB1) was conducted. The results were summarized in three main GO categories, namely Biological Process, Cellular Component and Molecular Function. The x-axis denoted the number of differentially expressed genes annotated in the GO category, while the y-axis indicated the GO term. The color of each GO category represented the  $-\log_{10}(Q\text{-value})$ . This value is a measure of the statistical significance of the GO term which is used to investigate the biological relevance of the DEGs.

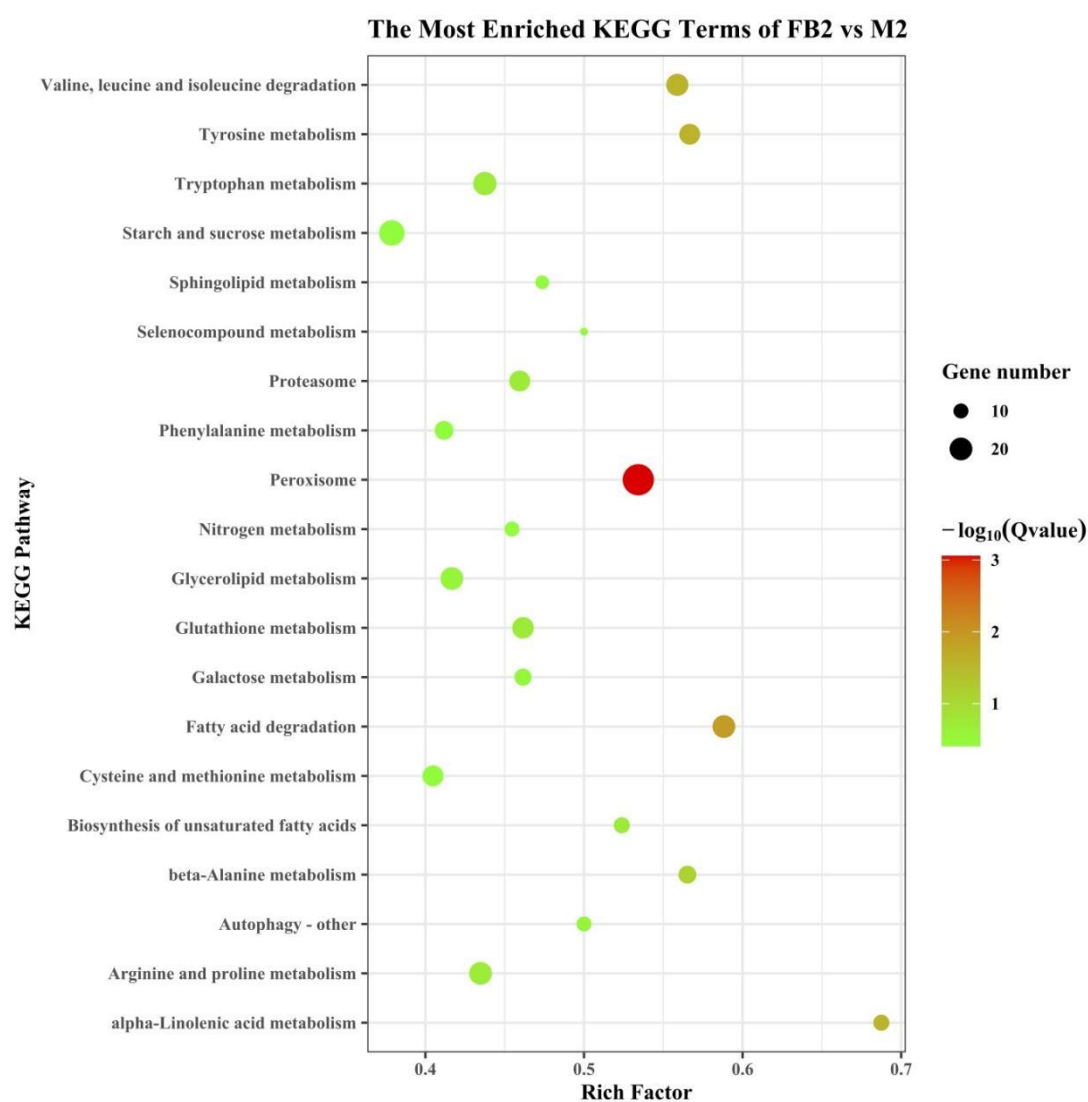

**Figure S6.** KEGG enrichment analysis of the differentially expressed genes (DEGs) between the fruiting body stage of *F. filiformis* Y33-J1 (FB2) and the mycelium growth stage of *F. filiformis* J1-Y33 (FB1) is presented. The x-axis of the figure displays the rich factor, while the y-axis reflects the KEGG pathway. The count indicates the number of DEGs enriched in the pathway, and the color implies the  $-\text{Log}_{10}(\text{Q-value})$  of each pathway.

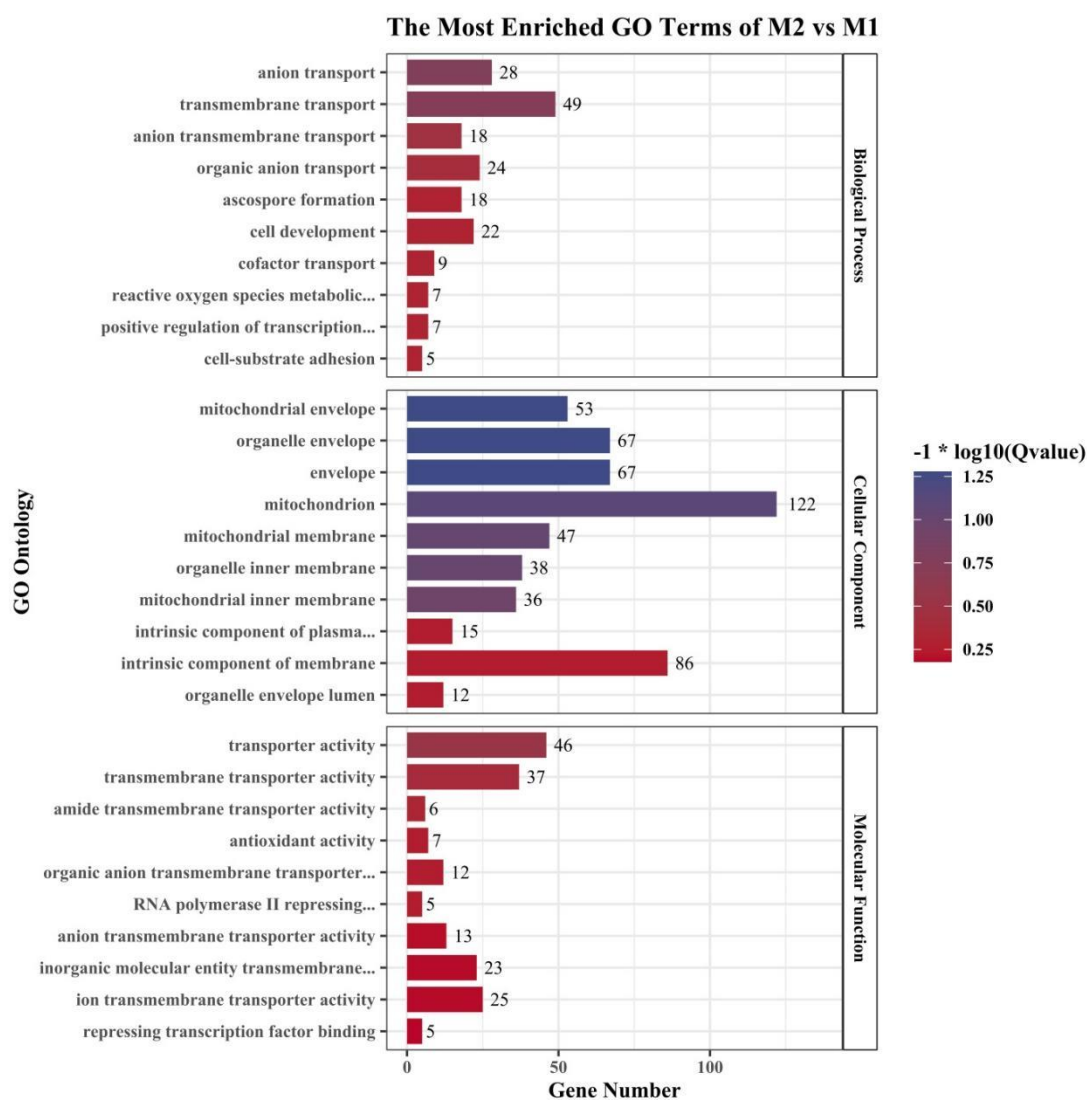

**Figure S7.** The Gene Ontology (GO) enrichment analysis of the differentially expressed genes (DEGs) between the mycelium growth stage of *F. filiformis* Y33-J1 (M2) and the mycelium growth stage of *F. filiformis* J1-Y33 (M1) was conducted. The results were summarized in three main GO categories, namely Biological Process, Cellular Component and Molecular Function. The x-axis denoted the number of differentially expressed genes annotated in the GO category, while the y-axis indicated the GO term. The color of each GO category represented the  $-\log_{10}(Q\text{-value})$ . This value is a measure of the statistical significance of the GO term which is used to investigate the biological relevance of the DEGs.



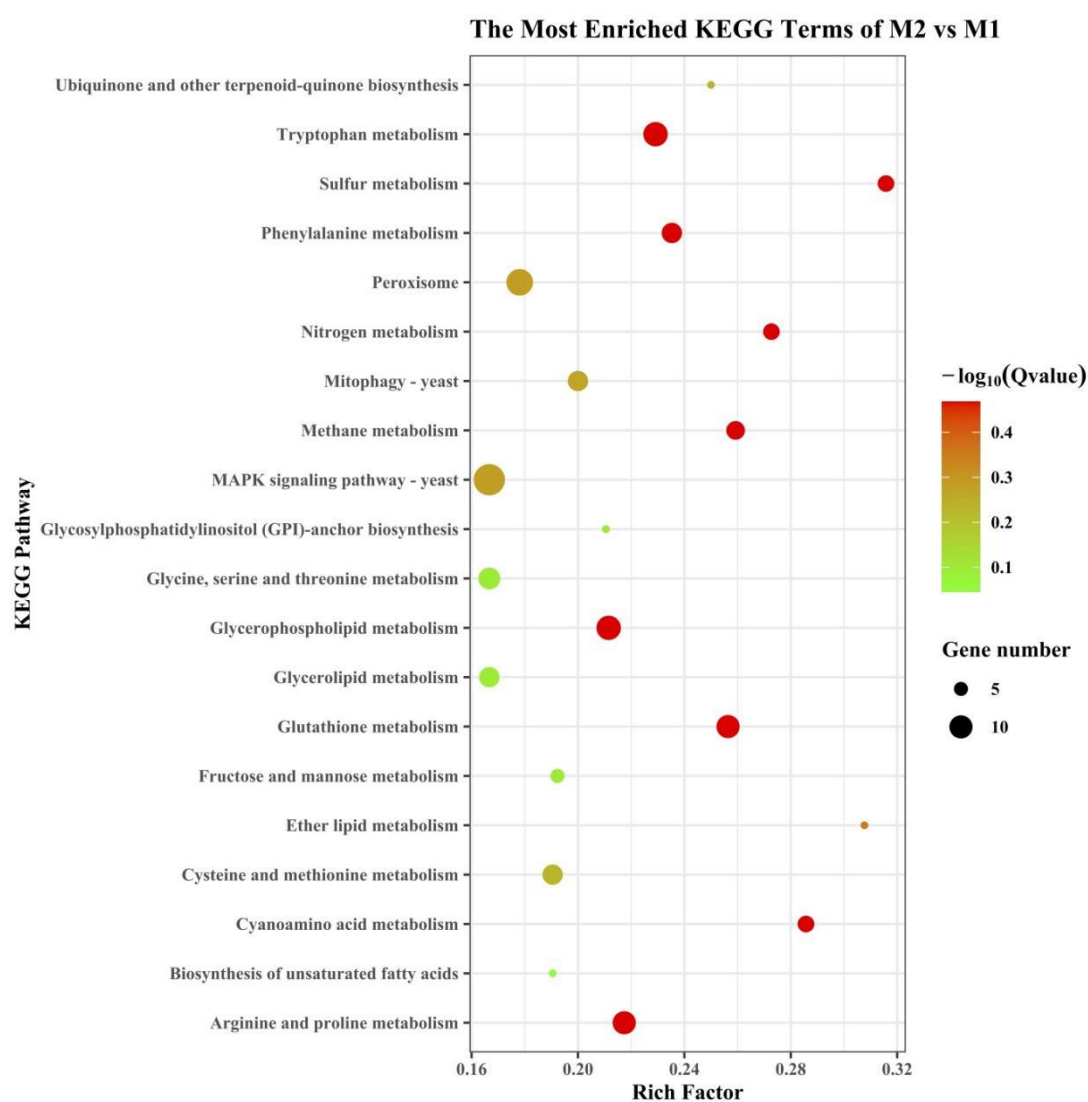

**Figure S8.** KEGG enrichment analysis of the differentially expressed genes (DEGs) between the mycelium growth stage of *F. filiformis* Y33-J1 (M2) and the mycelium growth stage of *F. filiformis* J1-Y33 (M1) is presented. The x-axis of the figure displays the rich factor, while the y-axis reflects the KEGG pathway. The count indicates the number of DEGs enriched in the pathway, and the color implies the  $-\text{Log}_{10}(\text{Q-value})$  of each pathway.

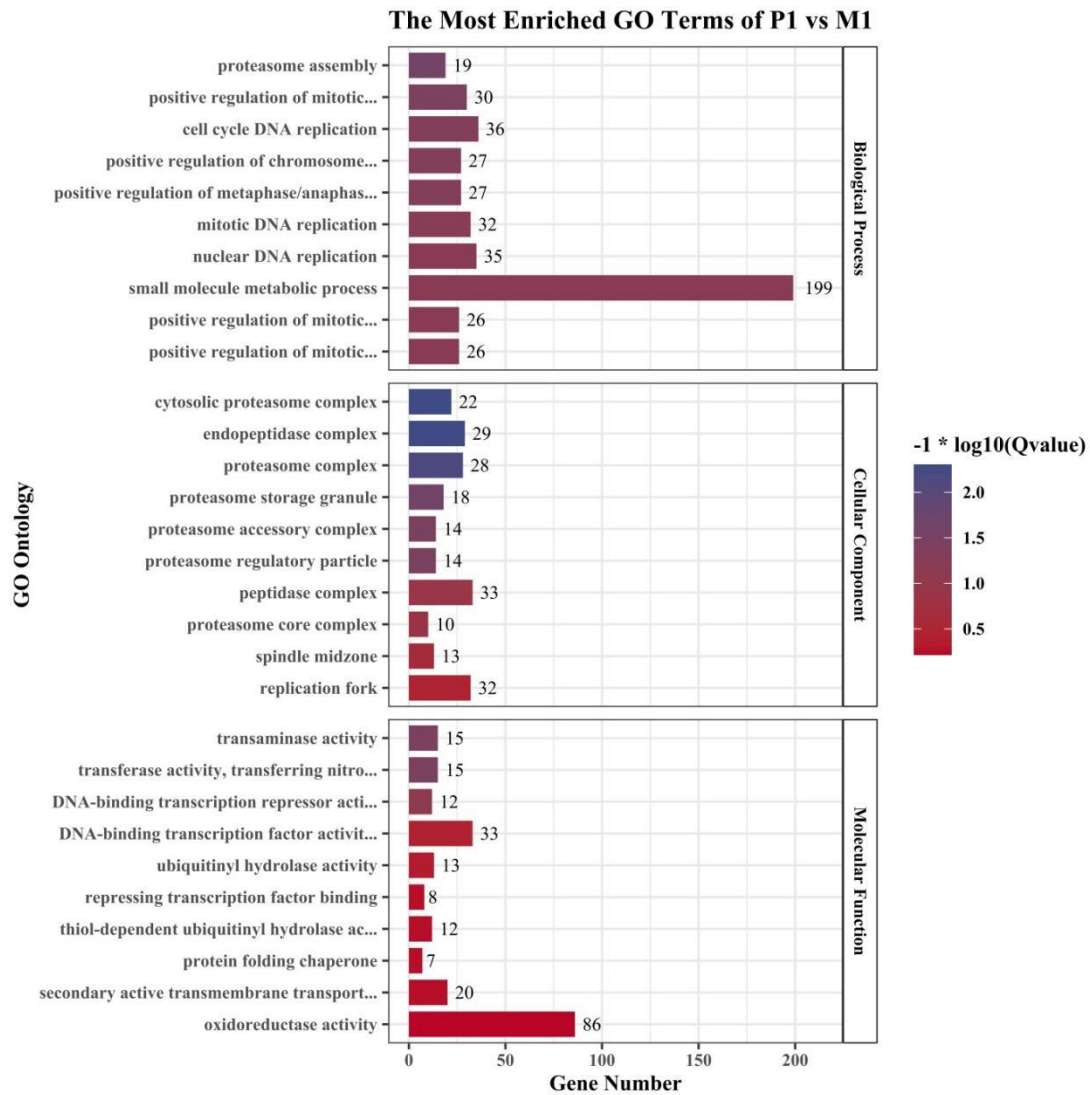

**Figure S9.** The Gene Ontology (GO) enrichment analysis of the differentially expressed genes (DEGs) between the primordia formation stage of *F. filiformis* J1-Y33 (P1) and the mycelium growth stage of *F. filiformis* J1-Y33 (M1) was conducted. The results were summarized in three main GO categories, namely Biological Process, Cellular Component and Molecular Function. The x-axis denoted the number of differentially expressed genes annotated in the GO category, while the y-axis indicated the GO term. The color of each GO category represented the  $-\log_{10}(Q\text{-value})$ . This value is a measure of the statistical significance of the GO term which is used to investigate the biological relevance of the DEGs.

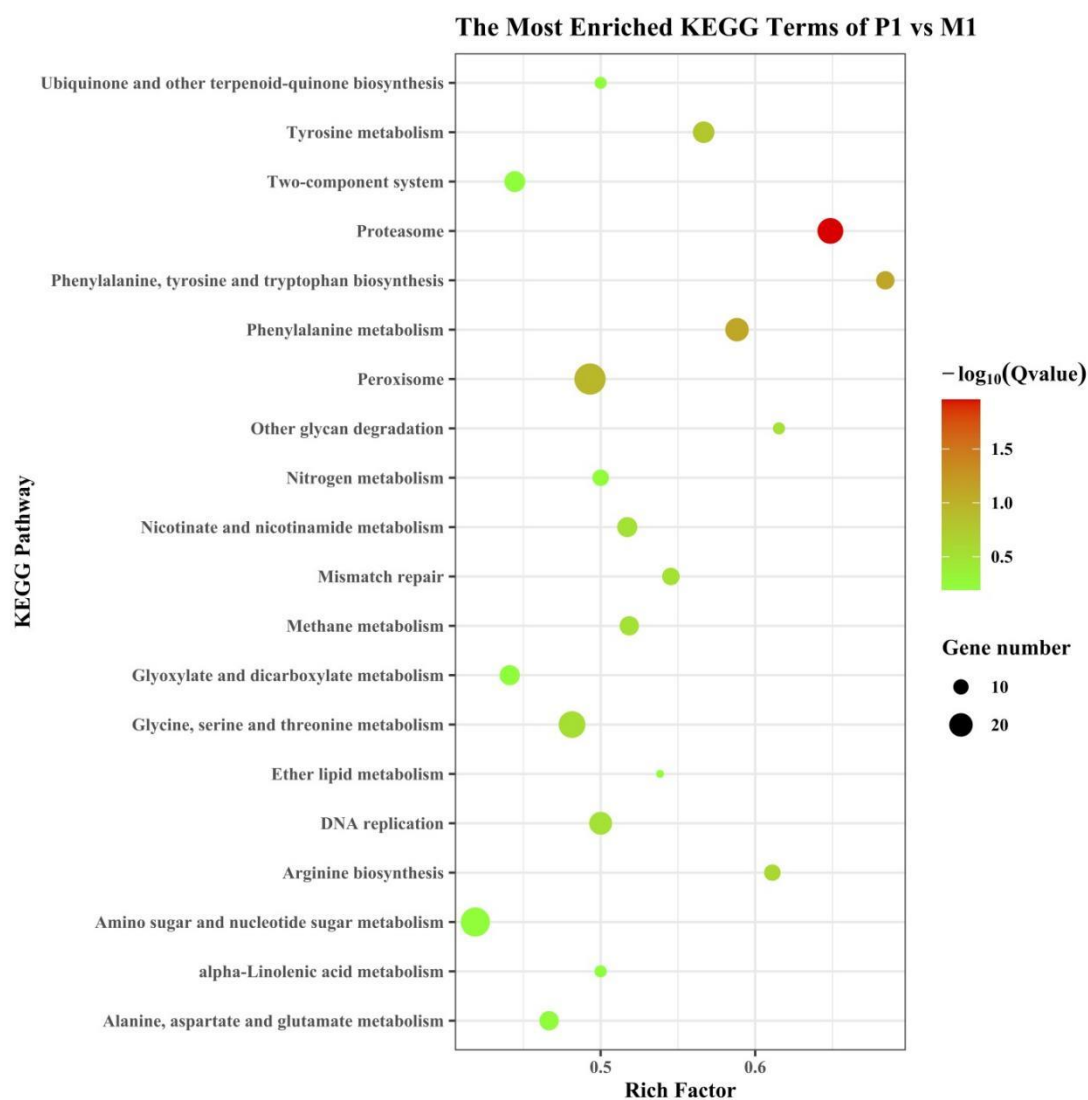

**Figure S10.** KEGG enrichment analysis of the differentially expressed genes (DEGs) between the primordia formation stage of *F. filiformis* J1-Y33 (P1) and the mycelium growth stage of *F. filiformis* J1-Y33 (M1) is presented. The x-axis of the figure displays the rich factor, while the y-axis reflects the KEGG pathway. The count indicates the number of DEGs enriched in the pathway, and the color implies the  $-\text{Log}_{10}(\text{Q-value})$  of each pathway.

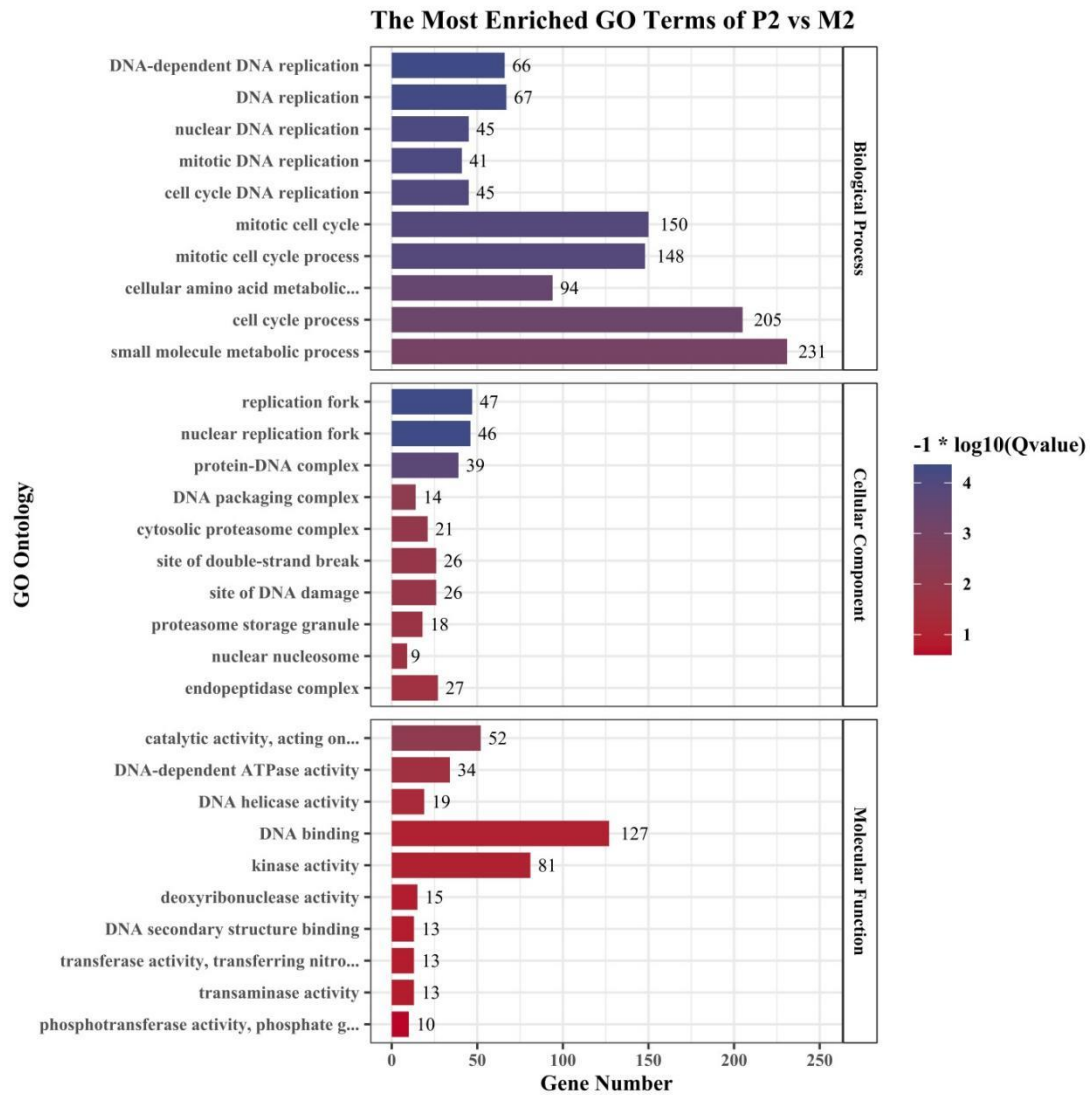

**Figure S11.** The Gene Ontology (GO) enrichment analysis of the differentially expressed genes (DEGs) between the primordia formation stage of *F. filiformis* Y33-J1 (P2) and the mycelium growth stage of *F. filiformis* Y33-J1 (M2) was conducted. The results were summarized in three main GO categories, namely Biological Process, Cellular Component and Molecular Function. The x-axis denoted the number of differentially expressed genes annotated in the GO category, while the y-axis indicated the GO term. The color of each GO category represented the  $-\log_{10}(\text{Q-value})$ . This value is a measure of the statistical significance of the GO term which is used to investigate the biological relevance of the DEGs.

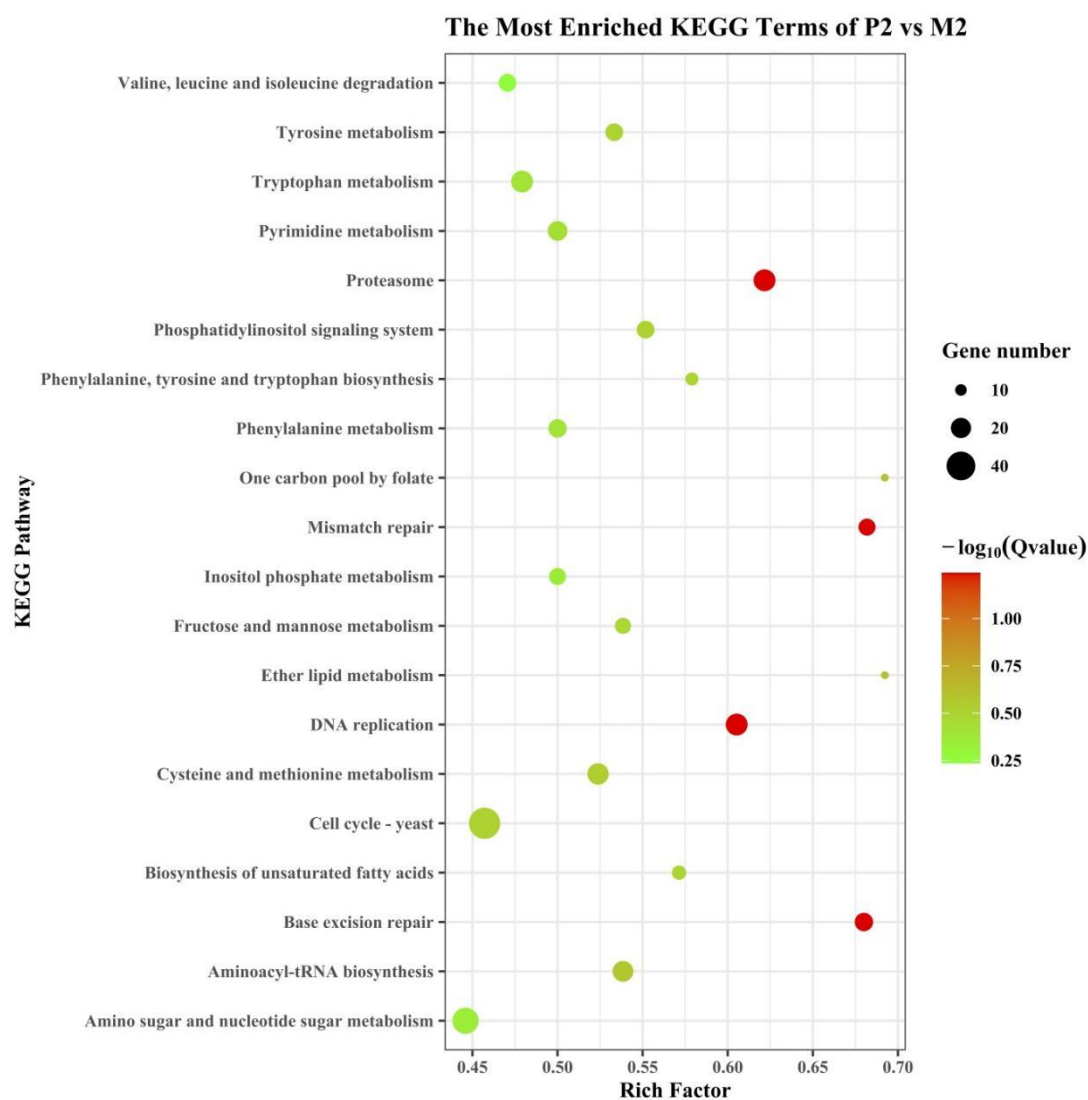

**Figure S12.** KEGG enrichment analysis of the differentially expressed genes (DEGs) between the primordia formation stage of *F. filiformis* Y33-J1 (P2) and the mycelium growth stage of *F. filiformis* Y33-J1 (M2) is presented. The x-axis of the figure displays the rich factor, while the y-axis reflects the KEGG pathway. The count indicates the number of DEGs enriched in the pathway, and the color implies the  $-\log_{10}(\text{Q-value})$  of each pathway.

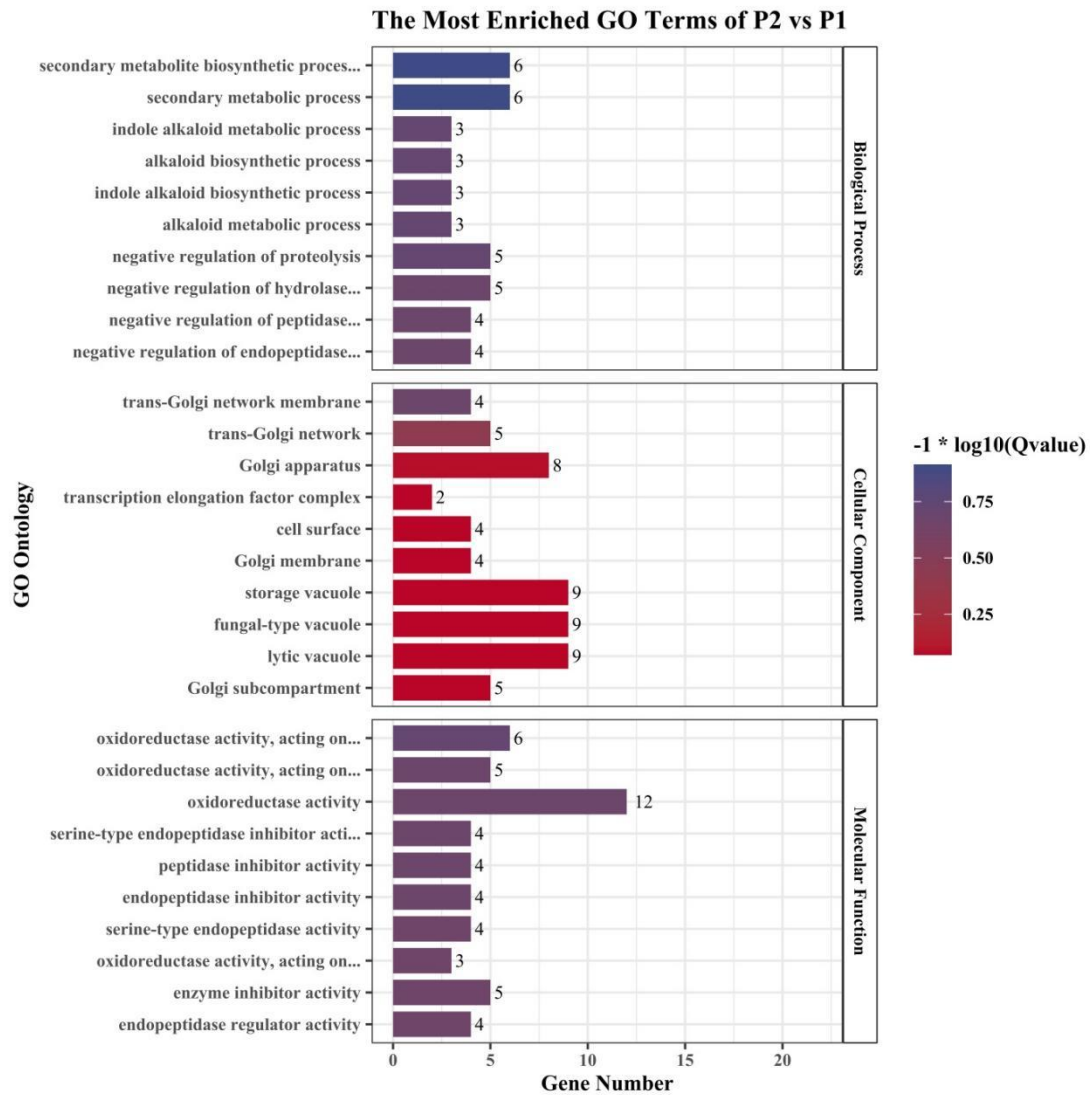

**Figure S13.** The Gene Ontology (GO) enrichment analysis of the differentially expressed genes (DEGs) between the primordia formation stage of *F. filiformis* Y33-J1 (P2) and the primordia formation stage of *F. filiformis* J1-Y33 (P1) was conducted. The results were summarized in three main GO categories, namely Biological Process, Cellular Component and Molecular Function. The x-axis denoted the number of differentially expressed genes annotated in the GO category, while the y-axis indicated the GO term. The color of each GO category represented the  $-\log_{10}(Q\text{-value})$ . This value is a measure of the statistical significance of the GO term which is used to investigate the biological relevance of the DEGs.

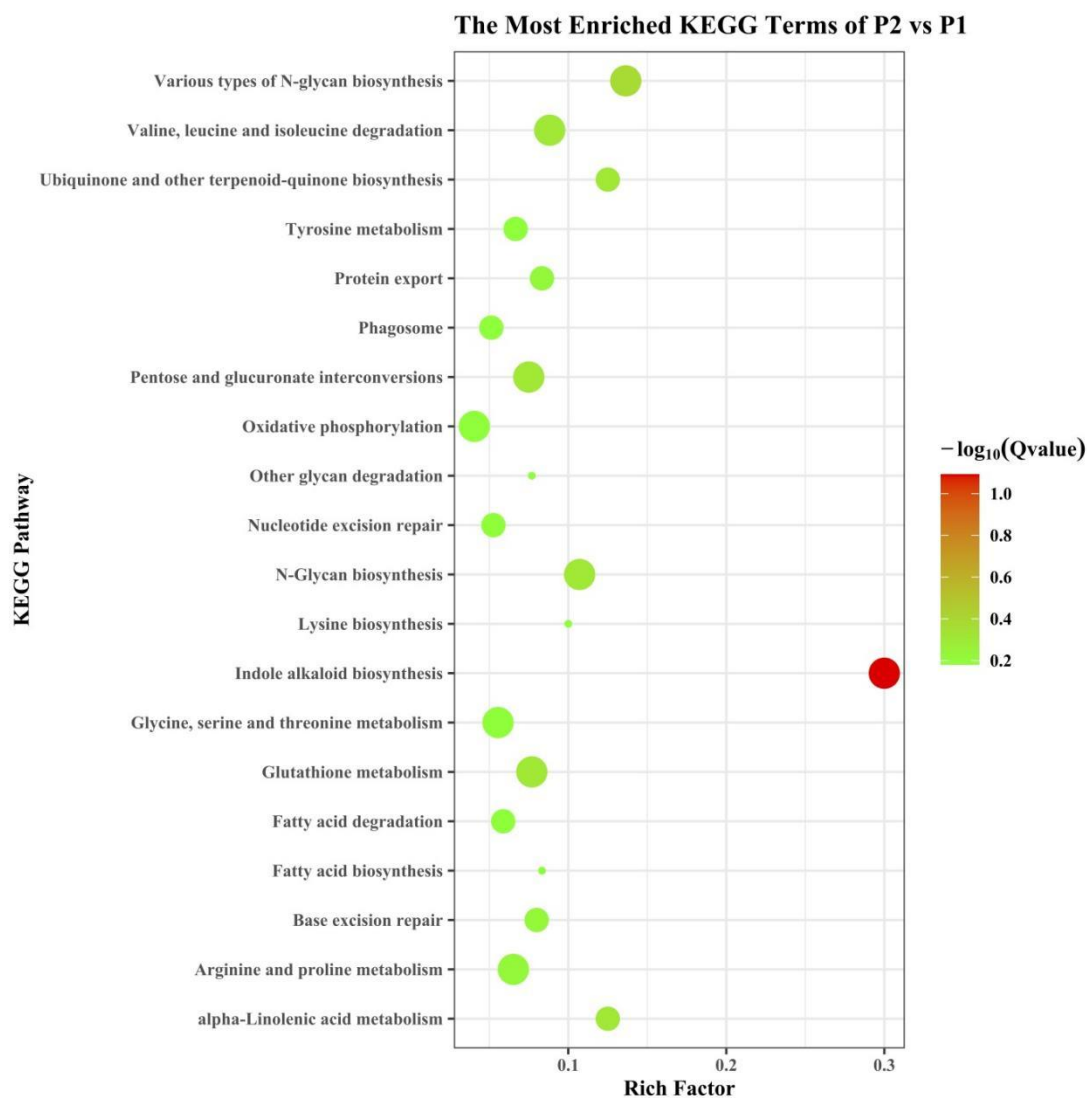

**Figure S14.** KEGG enrichment analysis of the differentially expressed genes (DEGs) between the primordia formation stage of *F. filiformis* Y33-J1 (P2) and the primordia formation stage of *F. filiformis* J1-Y33 (P1) is presented. The x-axis of the figure displays the rich factor, while the y-axis reflects the KEGG pathway. The count indicates the number of DEGs enriched in the pathway, and the color implies the  $-\text{Log}_{10}(\text{Q-value})$  of each pathway.

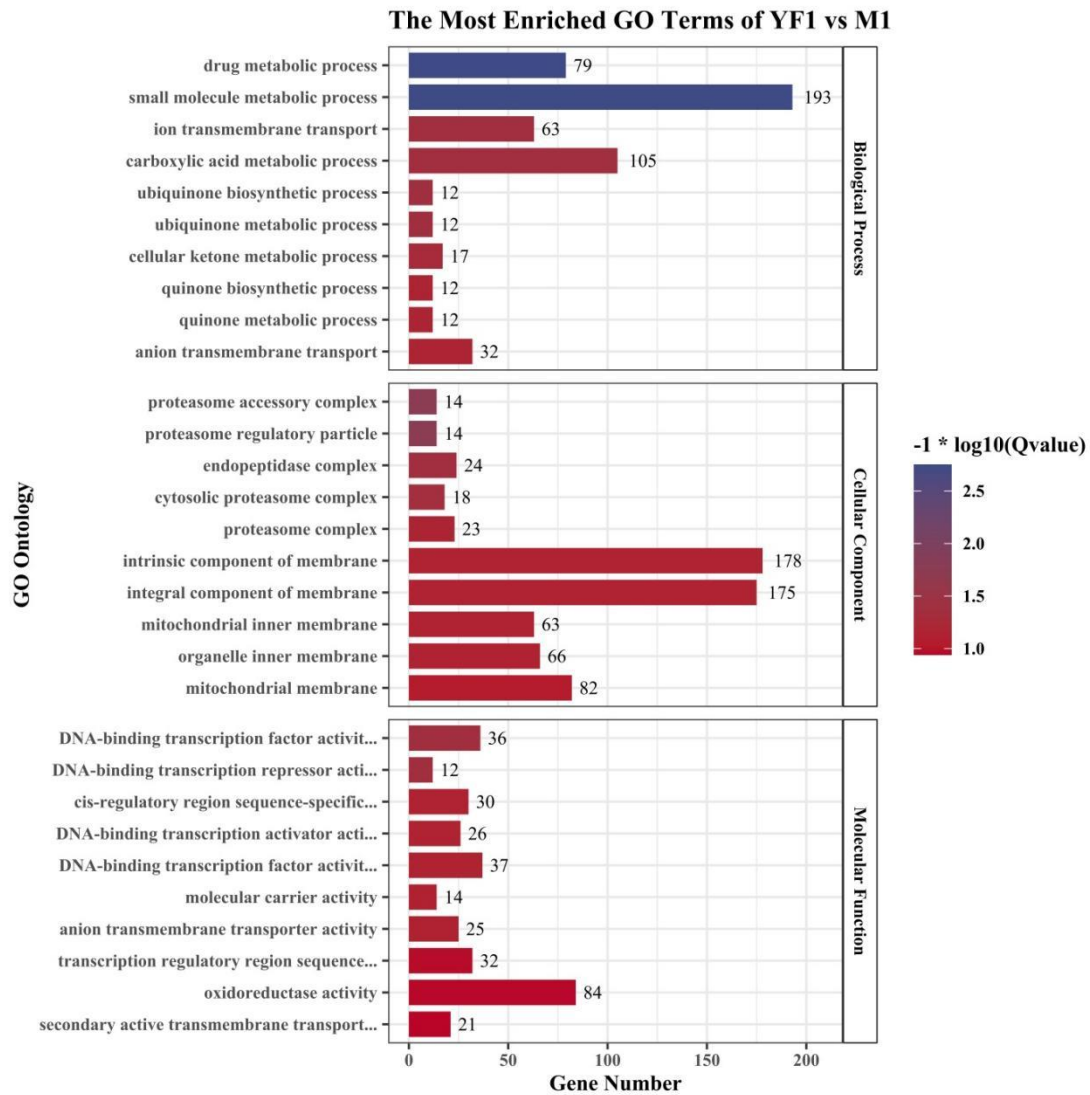

**Figure S15.** The Gene Ontology (GO) enrichment analysis of the differentially expressed genes (DEGs) between the young mushroom stage of *F. filiformis* J1-Y33 (YF1) and the mycelium growth stage of *F. filiformis* J1-Y33 (M1) was conducted. The results were summarized in three main GO categories, namely Biological Process, Cellular Component and Molecular Function. The x-axis denoted the number of differentially expressed genes annotated in the GO category, while the y-axis indicated the GO term. The color of each GO category represented the  $-\log_{10}(Q\text{-value})$ . This value is a measure of the statistical significance of the GO term which is used to investigate the biological relevance of the DEGs.



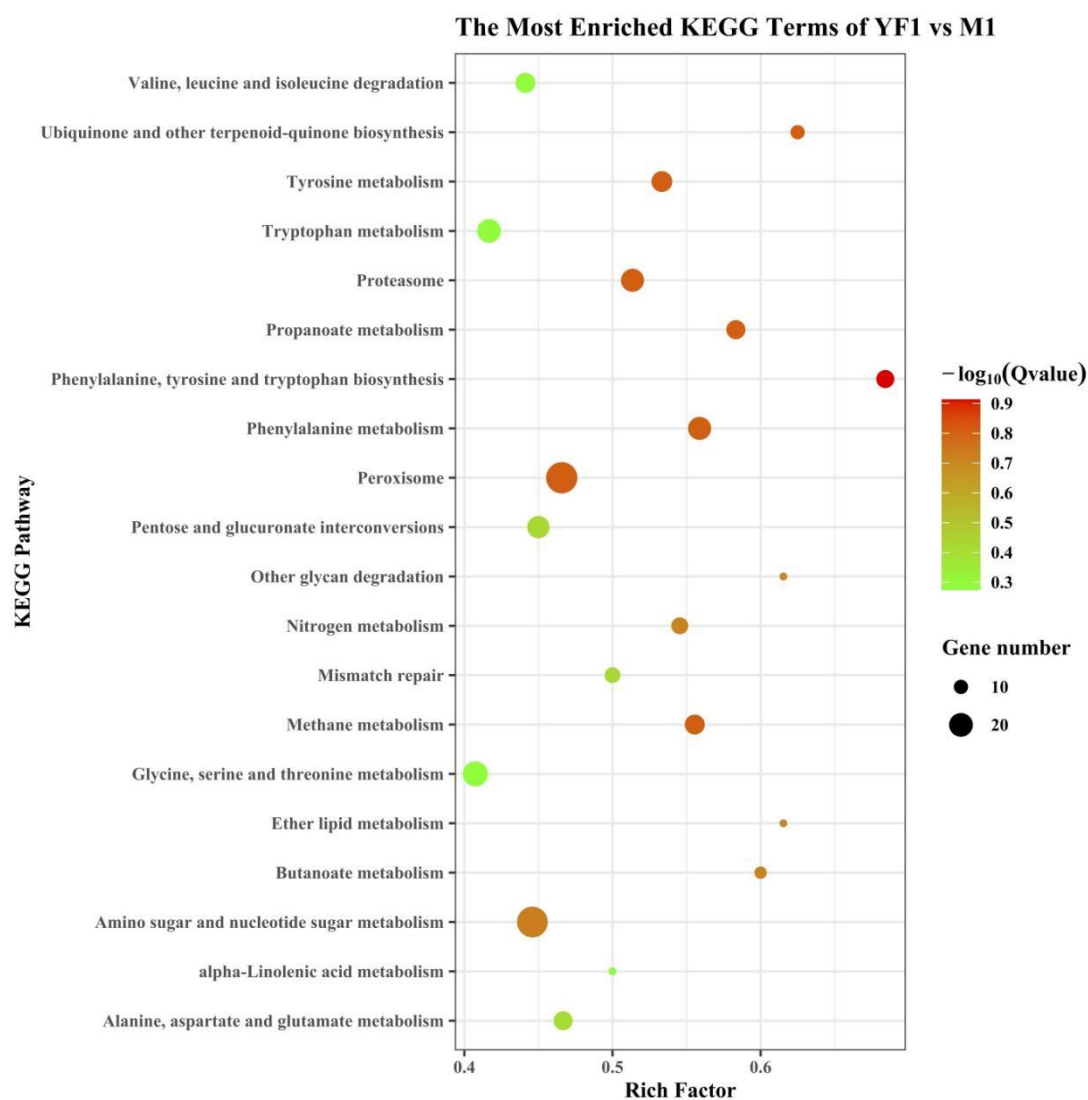

**Figure S16.** KEGG enrichment analysis of the differentially expressed genes (DEGs) between the young mushroom stage of *F. filiformis* J1-Y33 (YF1) and the mycelium growth stage of *F. filiformis* J1-Y33 (M1) is presented. The x-axis of the figure displays the rich factor, while the y-axis reflects the KEGG pathway. The count indicates the number of DEGs enriched in the pathway, and the color implies the  $-\log_{10}(\text{Q-value})$  of each pathway.

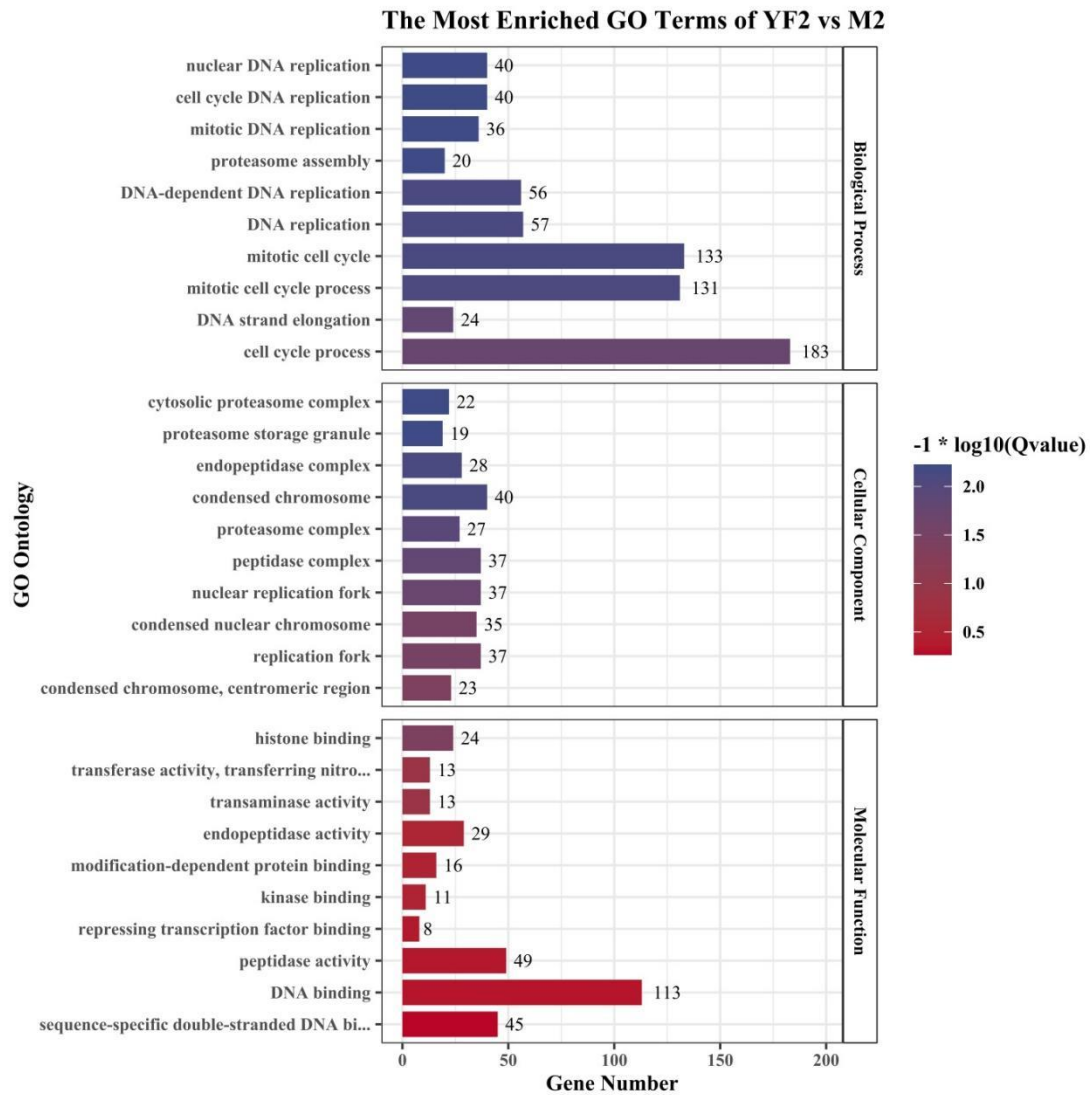

**Figure S17.** The Gene Ontology (GO) enrichment analysis of the differentially expressed genes (DEGs) between the young mushroom stage of *F. filiformis* Y33-J1 (YF2) and the mycelium growth stage of *F. filiformis* Y33-J1 (M2) was conducted. The results were summarized in three main GO categories, namely Biological Process, Cellular Component and Molecular Function. The x-axis denoted the number of differentially expressed genes annotated in the GO category, while the y-axis indicated the GO term. The color of each GO category represented the  $-\log_{10}(Q\text{-value})$ . This value is a measure of the statistical significance of the GO term which is used to investigate the biological relevance of the DEGs.

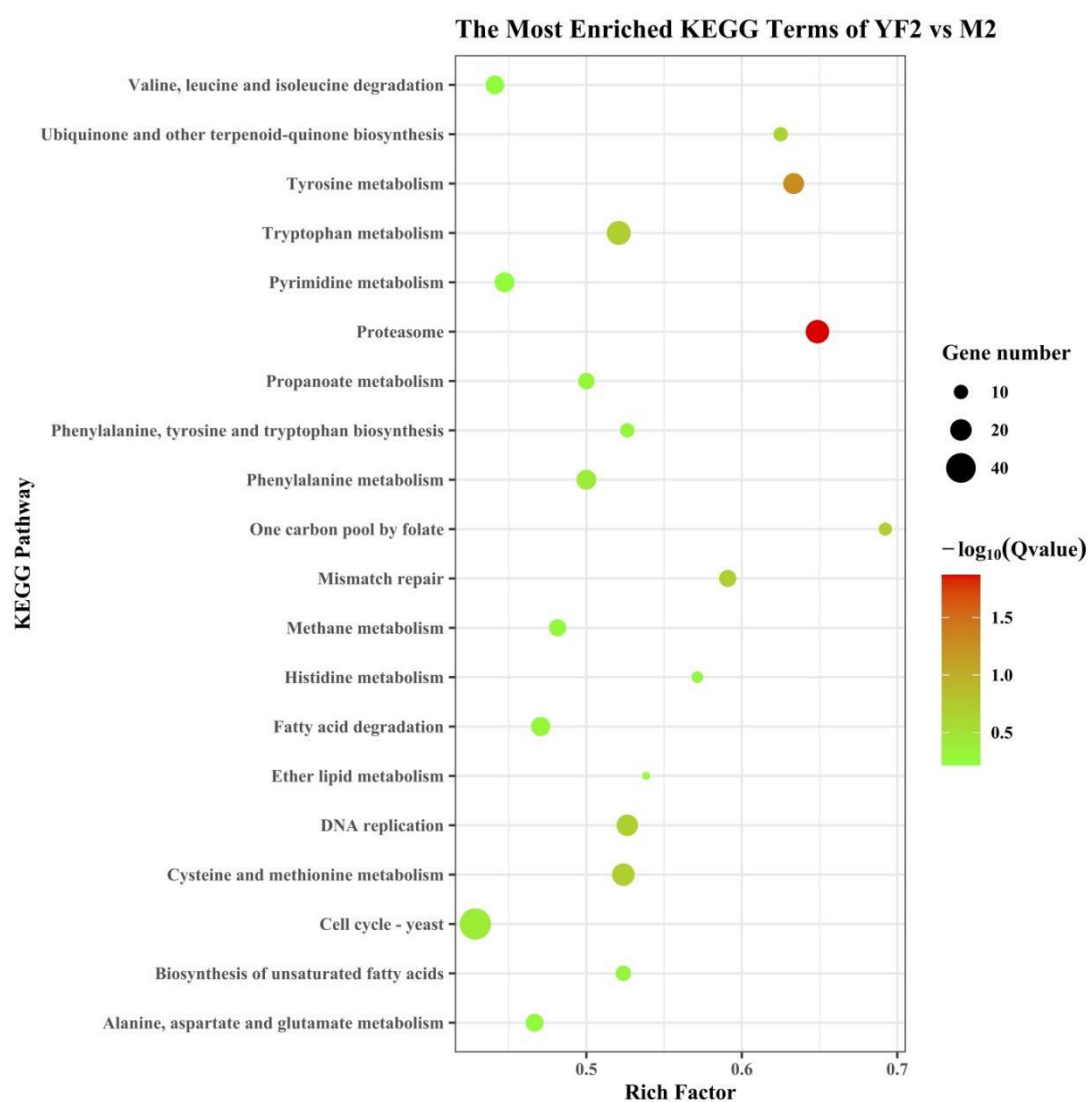

**Figure S18.** KEGG enrichment analysis of the differentially expressed genes (DEGs) between the young mushroom stage of *F. filiformis* Y33-J1 (YF2) and the mycelium growth stage of *F. filiformis* Y33-J1 (M2) is presented. The x-axis of the figure displays the rich factor, while the y-axis reflects the KEGG pathway. The count indicates the number of DEGs enriched in the pathway, and the color implies the  $-\log_{10}(\text{Q-value})$  of each pathway.

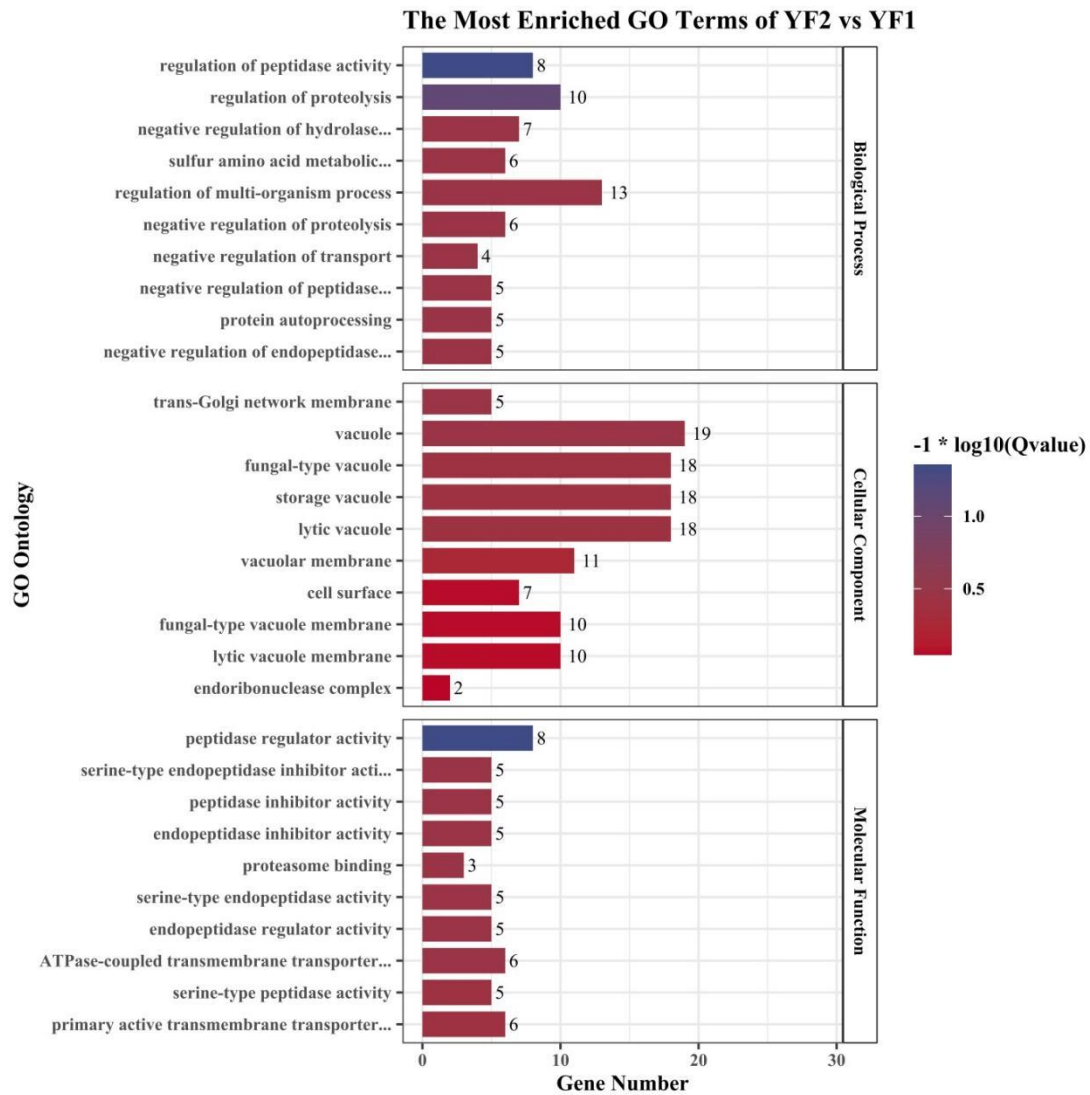

**Figure S19.** The Gene Ontology (GO) enrichment analysis of the differentially expressed genes (DEGs) between the young mushroom stage of *F. filiformis* Y33-J1 (YF2) and the young mushroom stage of *F. filiformis* J1-Y33 (YF1) was conducted. The results were summarized in three main GO categories, namely Biological Process, Cellular Component and Molecular Function. The x-axis denoted the number of differentially expressed genes annotated in the GO category, while the y-axis indicated the GO term. The color of each GO category represented the  $-\log_{10}(Q\text{-value})$ . This value is a measure of the statistical significance of the GO term which is used to investigate the biological relevance of the DEGs.

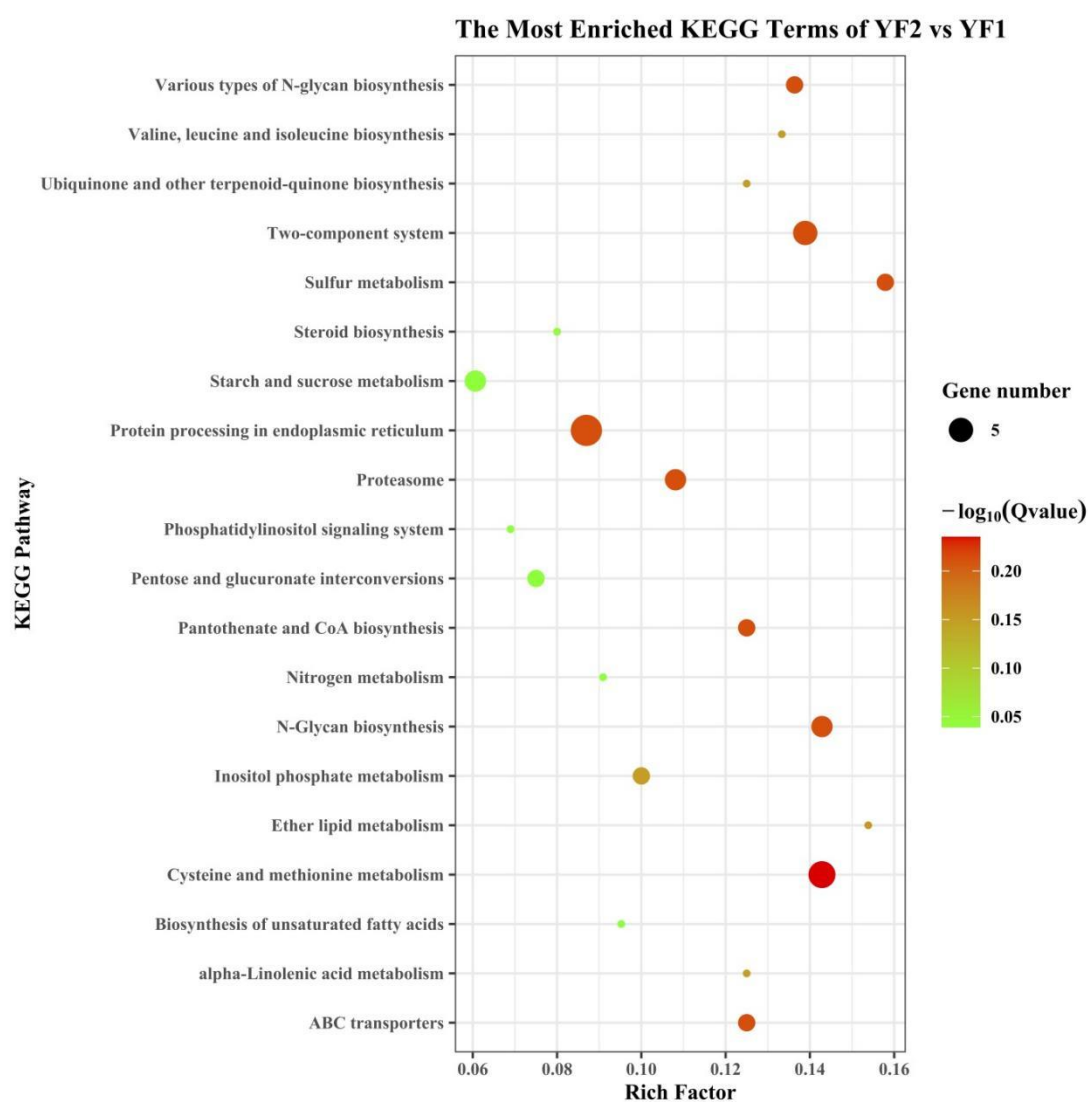

**Figure S20.** KEGG enrichment analysis of the differentially expressed genes (DEGs) between the young mushroom stage of *F. filiformis* Y33-J1 (YF2) and the young mushroom stage of *F. filiformis* J1-Y33 (YF1) is presented. The x-axis of the figure displays the rich factor, while the y-axis reflects the KEGG pathway. The count indicates the number of DEGs enriched in the pathway, and the color implies the  $-\log_{10}(Q\text{-value})$  of each pathway.
